# Supplementary material for: Transcripts of two ent-copalyl diphosphate synthase genes differentially localize in rice plants according to their distinct biological roles
Source: PubMed Central journal article supplement (PMC4265168; doi:10.1093/jxb/eru424), 2014-10-21
Supplement: supp_eru424_jexbot130641_file001.pdf [file supp_eru424_jexbot130641_file001.pdf]

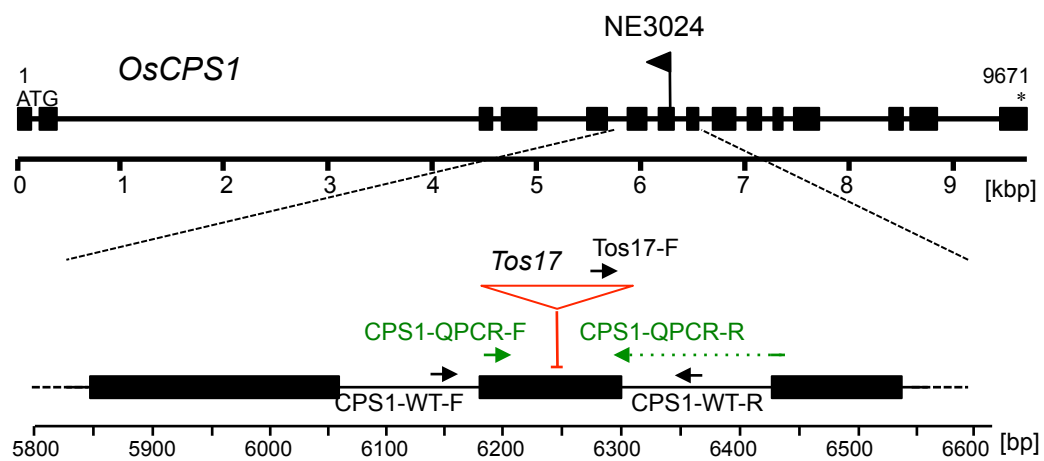

**Supplementary Fig. S1.** Primer design for transcript analyses and genotyping of *OsCPS1*. Schematic drawing of insertion site of retrotransposon *Tos17* in *oscps1-1* mutant (NE3024) is expanded. Green and black arrows indicate primer sets used for transcript analyses (CPS1-QRT-F and CPS1-QRT-R; Supplemental Table S1) and genotyping (Tos17-F, CPS1-WT-F and CPS1-WT-R; Supplemental Table S3), respectively.

A

```

OsCPS1 --MIHLHSPPTAPAAFGGAGSADWRRRRRWSWSSSSRAPVAKGGHLRPCVWRRGGDDGGG 58
OsCPS2 MQMQVLTAASSLPRATLLRPAAAEPWRQSFLQLQAR--PIQRPGIMLHCKAQLQGQE--- 55
      * * :...: * *      :*      *:: :  .:  *:: : * : * : * : *::

OsCPS1 EDHHADGGGGGGGGAAWRARATTAGVSSSSSTAKGLQANIIEHETPRITKWPNESRDLD 118
OsCPS2 ----------TRERRQLDDDEHARP----- 70
                        * : * : ** *

OsCPS1 HQQNNEADEEADDELQPLIVEQVRSMLSSMED--GAITASAYDTAWVALVPRLDGEG--GT 174
OsCPS2 PQGGDDVAASTSELPYMIESIKSKLRAARNSLGETTVSAYDTAWIALVNRLDGGGERSP 130
      * .::      : .**  ::*..:* * : .:  * *.*****:*** **** * ..

OsCPS1 QFPAAVRWIVGSQLADGSWGDEALFSAYDRVINTLACVVALTRWSLHHDQCKQGLQFLNL 234
OsCPS2 QFPEAIDWIARNQLPDGSWGDAGMFIVQDRLINTLGCVVALATWGVHEEQRARGLAYIQD 190
      *** * : ** . ** .***** .:* . **:****.*****: *.:*.:* :** :::

```

B

OsCPS1-N91 : OsCPS2-N108

```

MIHLHSPPTAPAAFGGAGSADWRRRRRWSWSSSSRAPVAKGGHLRPCVWRRGGDDGGGGEDHHAD
GGGGGGGGAAWRARATTAGVSSSSSTAgspgtMQMQVLTAASSLPRATLLRPAAAEPWRQSFLQ
LQARPIQRPGIMLHCKAQLQGQETRERRQLDDDEHARPPQGGDDVAASTSELPYMIESIKSKL
RAARNSLGETTV

```

**Supplementary Fig. S2.** Transit peptide-like sequences of OsCPSs. A, Deduced amino acid sequences of N-termini of OsCPSs. Green and red characters indicate the N-terminal 153 amino acids of OsCPS1 (OsCPS1-N153) and the N-terminal 108 amino acids of OsCPS2 (OsCPS2-N108), respectively, both of which were used in GFP experiments (Fig. 2). Green boldface characters indicate the N-terminal 91 amino acids of OsCPS1 (OsCPS1-N91) encoded by the first and second exons of OsCPS1p (Fig. 5). B, Deduced amino acid sequences of chimeric transit peptide-like translated product derived from pZH2B-OsCPS1p::OsCPS2 (Fig. 5). Lowercase black characters between OsCPS1-N91 and OsCPS2-N108 show the deduced five amino acids encoded by the residual multi-cloning-site fragment (Supplemental Fig. S3).

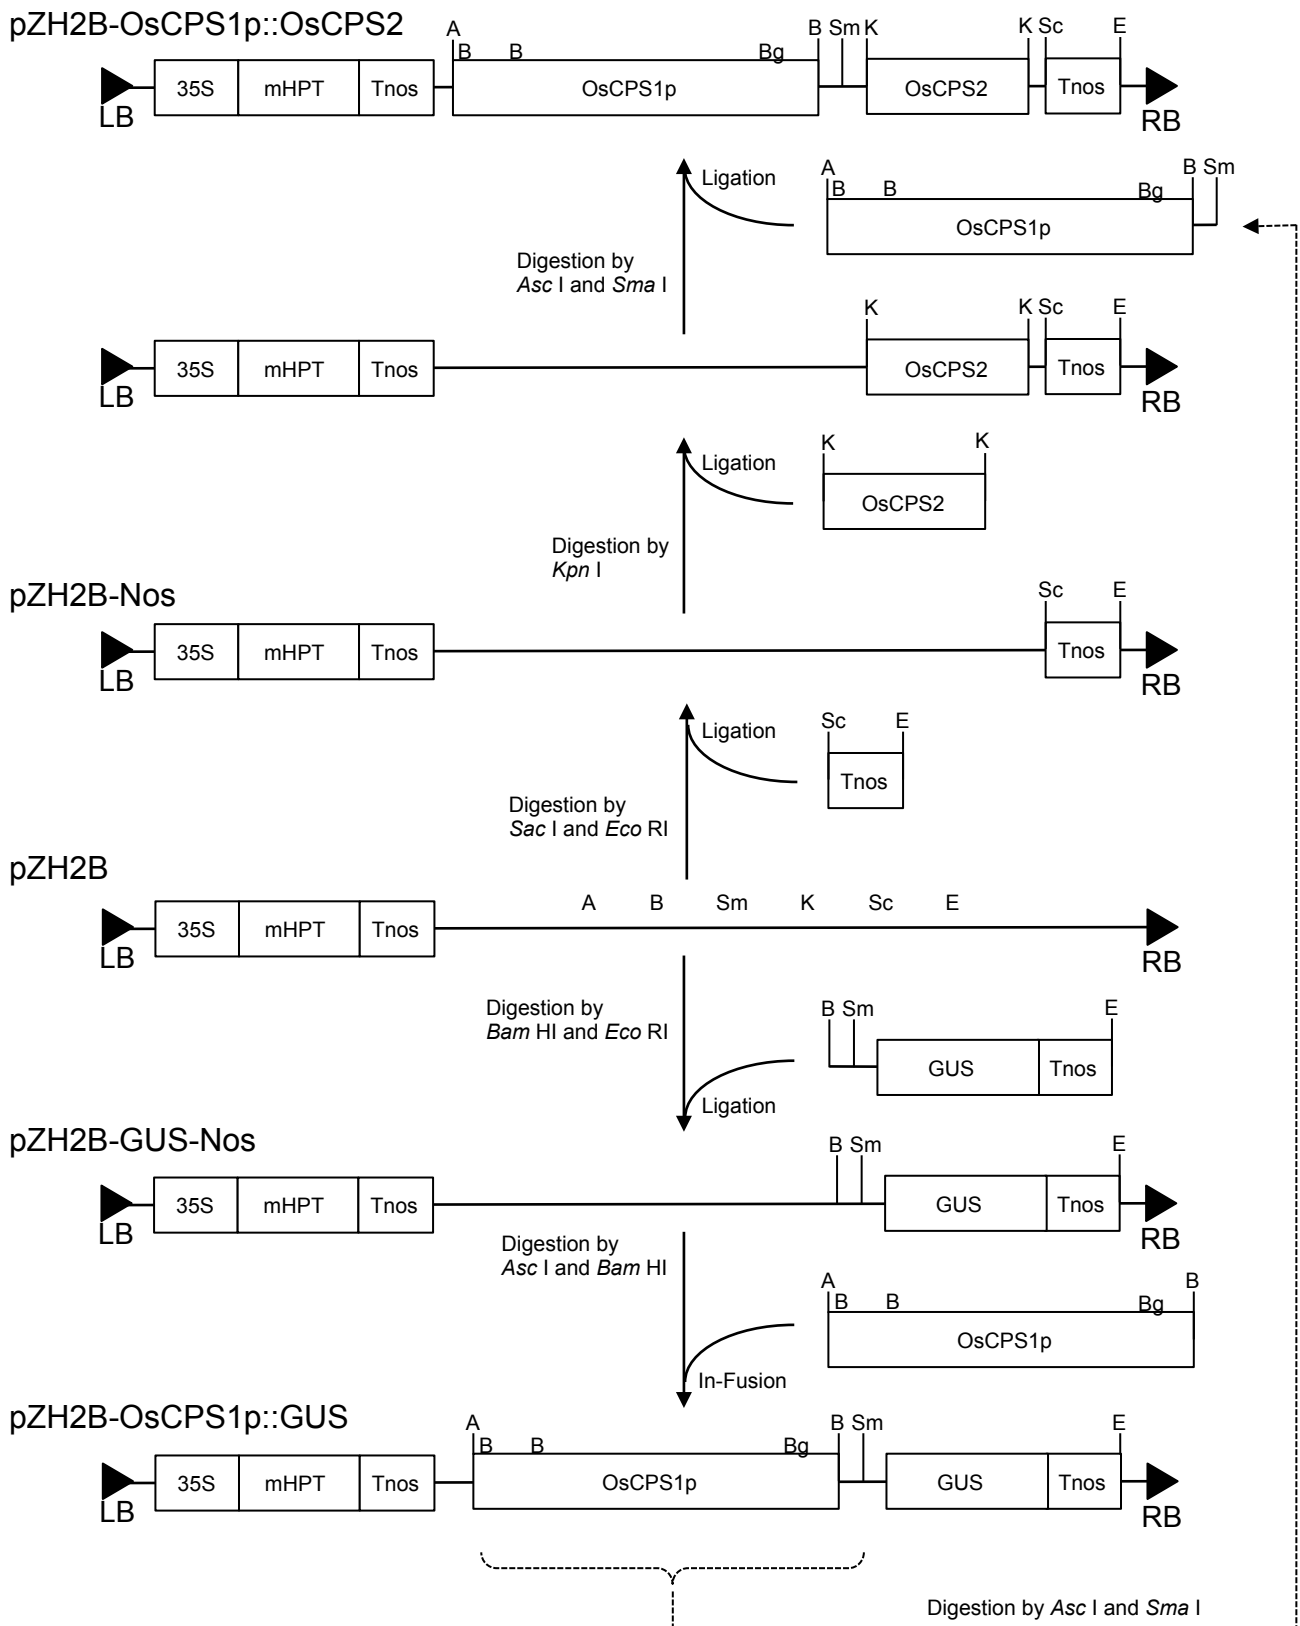

**Supplementary Fig. S3.** Construction of plasmids for introducing transgene. Restriction endonuclease sites: A, *AscI*; B, *BamHI*; Bg, *Bg/II*; E, *EcoRI*; K, *KpnI*; Sc, *SacI*; Sm, *SmaI*. Antibiotic gene: mHPT. Other DNA fragments: 35S, CaMV35S promoter; Tnos, NOS terminator; LB, T-DNA left border, RB, T-DNA right border. OsCPS1p has two *BamHI* sites and one *Bg/II* site. **The In-Fusion reaction was performed with an In-Fusion HD cloning kit (Takara Bio), as described in the Materials and methods section.**

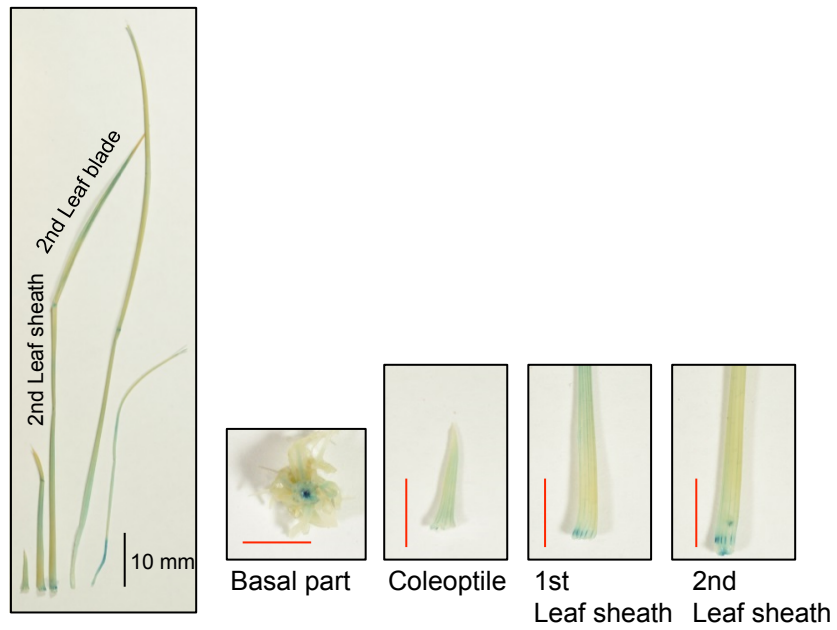

**Supplementary Fig. S4.** GUS staining of a four-leaf-stage rice seedling. Images show a T1 line plant into which pZH2B-OsCPS1p::*GUS* was introduced. The OsCPS1p::*GUS* construct and GUS staining of the sliced second-leaf sheath are shown in Fig. 5. Linear GUS staining was observed in vascular-bundle tissues in the leaf sheath. Black and red bars indicate 10 mm and 5 mm, respectively.

OsCPS1-N91

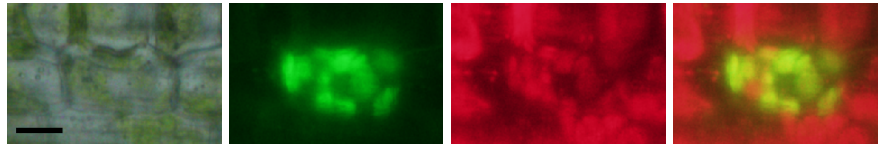

OsCPS1-N91:OsCPS2-N108

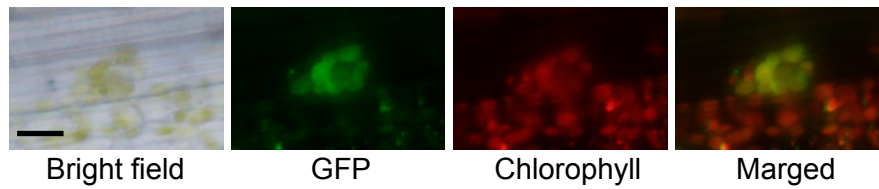

**Supplementary Fig. S5.** Subcellular localization of GFP fused to the N-terminal 91 amino acids of OsCPS1 (OsCPS1-N91) and the chimeric peptide OsCPS1-N91:OsCPS2-N108 at its N terminus. OsCPS1-N91:OsCPS2-N108 is shown in Supplementary Fig. S2B. GFP fluorescence was observed under fluorescence microscopy, as described in Materials and methods. Bars indicate 10  $\mu$ m. GFP control is shown in Fig. 2.

**Supplemental Table S1.** Sequences of primers used for qRT-PCR

| Name           | Sequence (5' -> 3')  |
|----------------|----------------------|
| CPS1-QPCR-F    | GAACGTTTACCCGGTCGATC |
| CPS1-QPCR-R    | CTTCAGTCCAGTGCCTGTTG |
| CPS2-QPCR-F    | CGAGGAGCTTACTGTACGC  |
| CPS2-QPCR-R    | TGAGCAGATCTCGATTGTG  |
| 18S-rRNA-QRT-F | GGAGCGATTTGTCTGGTTA  |
| 18S-rRNA-QRT-R | ATCTAAGGGCATCACAGACC |

CPS2-QPCR-F and CPS2-QPCR-R were used not only for qRT-PCR but also for genotyping.

**Supplemental Table S2.** Sequences of primers used for GFP experiments

| Name              | Sequence (5' -> 3')                              |
|-------------------|--------------------------------------------------|
| XbaI-CPS1-F       | tctagaATGATTCACCTCCACTCCCCGCCGACGGCG             |
| BamHI-CPS1-N153-R | ggatccGGTGATCGCGCCGTCCTCCAT                      |
| XbaI-CPS2-F       | tctagaATGCAGATGCAGGTGCTCAC                       |
| BamHI-CPS2-N108-R | ggatccGACGGTGGTCTCGCCGAGG                        |
| CPS1N91CPS2-F     | GCCGGATC <u>ACCGGGTACC</u> catgcagatgcaggtgctcac |
| CPS1N91CPS2-R     | catGGTACCCGGT <u>GATCC</u> GGCTGTACTGCTGGAGCTCG  |

Small captures in XbaI-CPS1-F, XbaI-CPS2-F and XbaI-CPS4-F show *XbaI* site. Small captures in BamHI-CPS1-N153-R, BamHI-CPS2-N108-R and BamHI-CPS4-N101-R show *BamHI* site. Small captures and underlined letters in CPS1N91CPS2-F and CPS1N91CPS2-R show sequences of 5' end of OsCPS2 ORF and sequences of residual multi-cloning-site fragment between OsCPS1p and OsCPS2 in pZH2B (Supplemental Fig. S2B and S3). Double-underlined characters represent substituted nucleotides for the deletion of the *BamHI* site in the residual multi-cloning-site fragment, without changing an encoded amino acid (CPS1N91CPS2-F, C to A; CPS1N91CPS2-R, G to T). The overlap region of CPS1N91CPS2-F and CPS1N91CPS2-R, including the residual multi-cloning-site sequences, is for the In-Fusion reaction, as described in the Materials and methods section.

**Supplemental Table S3.** Sequences of primers used for complementation experiments

| Name             | Sequence (5' -> 3')                      |
|------------------|------------------------------------------|
| IF-AscI-CPS1p-F  | atgttactaggcgcgCCTACGCCATATCATTGCCTTTATC |
| IF-BamHI-CPS1p-R | gaccaccggggatcCGGCTGTACTGCTGGAGCTCGACAC  |
| KpnI-CPS2-F      | ggtaccATGCAGATGCAGGTGCTCA                |
| KpnI-CPS2-R      | ggtaccTAATTGACATCCTCGAACA                |
| Tos17-F          | TGACAACACCGGAGCTATAC                     |
| CPS1-WT-F        | GCAGCTGATCTCAGATCATG                     |
| CPS1-WT-R        | ACAGAAGACACCACACATATCAG                  |

Small captures in IF-ASCI-CPS1p-F and IF-BamHI-CPS1p-R show terminal sequences of digested pZH2B-GUS-Nos vector (Supplementary Fig. S3) for introduction by In-Fusion reaction, as described in the Materials and methods section. Small captures in KpnI-CPS2-F and KpnI-CPS2-R show *Kpn* I site. Tos17-F, CPS1-WT-F, and CPS1-WT-R are for genotyping.
